# Supplementary material for: Identification of DNA methylation-driven genes by integrative analysis of DNA methylation and transcriptome data in pancreatic adenocarcinoma
Source: PubMed Central journal article supplement — Exp Ther Med. 2020 Feb 26;19(4):2963–72. doi: 10.3892/etm.2020.8554 (PMC7086284; doi:10.3892/etm.2020.8554), 2020-02-26
Supplement: Supplementary_Data.pdf [file Supplementary_Data.pdf]

Table S1. Detailed clinical characteristics of the TCGA pancreatic adenocarcinoma cohort.

| Sample ID         | Sample type | DNA methylation | Transcriptome profiling | OS (days) | Survival status | RFS (days) | Relapse status | Age (years) | Gender | Surgery type          | TNM stage |
|-------------------|-------------|-----------------|-------------------------|-----------|-----------------|------------|----------------|-------------|--------|-----------------------|-----------|
| TCGA-FZ-5919-11A  | Normal      | Yes             | No                      | 741       | 1               | NA         | NA             | 59          | Female | Whipple               | Stage II  |
| TCGA-FZ-5920-11A  | Normal      | Yes             | No                      | 61        | 1               | NA         | NA             | 52          | Male   | Whipple               | Stage II  |
| TCGA-FZ-5922-11A  | Normal      | Yes             | No                      | 1,101     | 1               | 740        | 1              | 81          | Male   | Whipple               | Stage II  |
| TCGA-FZ-5923-11A  | Normal      | Yes             | No                      | 619       | 1               | 619        | 0              | 71          | Male   | Whipple               | Stage IV  |
| TCGA-FZ-5924-11A  | Normal      | Yes             | No                      | 480       | 1               | 480        | 0              | 83          | Male   | Other method          | Stage II  |
| TCGA-FZ-5926-11A  | Normal      | Yes             | No                      | 541       | 1               | 541        | 0              | 73          | Female | Whipple               | Stage III |
| TCGA-H6-8124-11A  | Normal      | Yes             | Yes                     | 392       | 0               | 259        | 1              | 56          | Female | Whipple               | Stage II  |
| TCGA-H6-A45N-11A  | Normal      | Yes             | Yes                     | 421       | 1               | 363        | 1              | 88          | Female | Distal pancreatectomy | Stage II  |
| TCGA-HV-A5A3-11A  | Normal      | Yes             | Yes                     | 128       | 1               | 128        | 0              | 50          | Male   | Distal pancreatectomy | Stage II  |
| TCGA-YB-A89D-11A  | Normal      | Yes             | Yes                     | 350       | 0               | 350        | 0              | 59          | Male   | Whipple               | Stage II  |
| TCGA-2J-AAAB1-01A | Tumor       | Yes             | Yes                     | 66        | 1               | 66         | 0              | 65          | Male   | Whipple               | Stage II  |
| TCGA-2J-AAAB4-01A | Tumor       | Yes             | Yes                     | 729       | 0               | 729        | 0              | 48          | Male   | Distal pancreatectomy | Stage II  |
| TCGA-2J-AAAB6-01A | Tumor       | Yes             | Yes                     | 293       | 1               | NA         | NA             | 75          | Male   | Distal pancreatectomy | Stage II  |
| TCGA-2J-AAAB8-01A | Tumor       | Yes             | Yes                     | 80        | 0               | 80         | 0              | 71          | Male   | Whipple               | Stage II  |
| TCGA-2J-AAAB9-01A | Tumor       | Yes             | Yes                     | 627       | 1               | NA         | NA             | 70          | Female | Whipple               | Stage II  |
| TCGA-2J-AABA-01A  | Tumor       | Yes             | Yes                     | 607       | 1               | 160        | 1              | 55          | Male   | Whipple               | Stage II  |
| TCGA-2J-AABE-01A  | Tumor       | Yes             | Yes                     | 676       | 0               | 676        | 0              | 73          | Male   | Distal pancreatectomy | Stage II  |
| TCGA-2J-AABF-01A  | Tumor       | Yes             | Yes                     | 691       | 1               | 443        | 1              | 73          | Male   | Whipple               | Stage II  |
| TCGA-2J-AABH-01A  | Tumor       | Yes             | Yes                     | 1,287     | 0               | 1,287      | 1              | 61          | Male   | Distal pancreatectomy | Stage II  |
| TCGA-2J-AABI-01A  | Tumor       | Yes             | Yes                     | 969       | 0               | 728        | 1              | 55          | Female | Whipple               | Stage II  |
| TCGA-2J-AABK-01A  | Tumor       | Yes             | Yes                     | 484       | 0               | 484        | 0              | 71          | Male   | Whipple               | Stage II  |
| TCGA-2J-AABO-01A  | Tumor       | Yes             | Yes                     | 440       | 0               | 439        | 1              | 43          | Male   | Whipple               | Stage II  |
| TCGA-2J-AABP-01A  | Tumor       | Yes             | Yes                     | 463       | 0               | 463        | 0              | 58          | Female | Distal pancreatectomy | Stage II  |
| TCGA-2J-AABR-01A  | Tumor       | Yes             | Yes                     | 438       | 0               | 327        | 1              | 60          | Female | Whipple               | Stage II  |
| TCGA-2J-AABT-01A  | Tumor       | Yes             | Yes                     | 319       | 0               | NA         | NA             | 72          | Female | Whipple               | Stage II  |
| TCGA-2J-ABU-01A   | Tumor       | Yes             | Yes                     | 277       | 1               | NA         | NA             | 56          | Male   | Whipple               | Stage II  |
| TCGA-2J-ABV-01A   | Tumor       | Yes             | Yes                     | 652       | 1               | 126        | 1              | 74          | Male   | Whipple               | Stage II  |
| TCGA-2L-AAQA-01A  | Tumor       | Yes             | Yes                     | 143       | 1               | 143        | 0              | 76          | Male   | Whipple               | Stage II  |
| TCGA-2L-AAQE-01A  | Tumor       | Yes             | Yes                     | 684       | 1               | 684        | 0              | 56          | Male   | Whipple               | Stage II  |
| TCGA-2L-AAQI-01A  | Tumor       | Yes             | Yes                     | 103       | 1               | 103        | 0              | 66          | Male   | Whipple               | Stage II  |
| TCGA-2L-AAQJ-01A  | Tumor       | Yes             | Yes                     | 394       | 1               | 394        | 0              | 49          | Female | Whipple               | Stage III |
| TCGA-2L-AAQL-01A  | Tumor       | Yes             | Yes                     | 292       | 1               | 292        | 0              | 82          | Male   | Whipple               | Stage II  |
| TCGA-2L-AAQM-01A  | Tumor       | Yes             | Yes                     | 1,383     | 0               | 1,383      | 0              | 52          | Male   | Distal pancreatectomy | Stage II  |
| TCGA-3A-A9I5-01A  | Tumor       | Yes             | Yes                     | 1,794     | 0               | 1,794      | 0              | 57          | Male   | Whipple               | NA        |
| TCGA-3A-A9I7-01A  | Tumor       | Yes             | Yes                     | 1,323     | 0               | 1,309      | 1              | 45          | Male   | Whipple               | Stage II  |
| TCGA-3A-A9I9-01A  | Tumor       | Yes             | Yes                     | 634       | 1               | NA         | NA             | 67          | Male   | Whipple               | Stage II  |
| TCGA-3A-A9IB-01A  | Tumor       | Yes             | Yes                     | 224       | 1               | 224        | 0              | 69          | Female | Whipple               | Stage II  |
| TCGA-3A-A9IC-01A  | Tumor       | Yes             | Yes                     | 738       | 1               | 738        | 0              | 61          | Female | Whipple               | Stage II  |

Table S1. Continued.

| Sample ID        | Sample type | DNA methylation | Transcriptome profiling | OS (days) | Survival status | RFS (days) | Relapse status | Age (years) | Gender | Surgery type          | TNM stage |
|------------------|-------------|-----------------|-------------------------|-----------|-----------------|------------|----------------|-------------|--------|-----------------------|-----------|
| TCGA-3A-A9IH-01A | Tumor       | Yes             | Yes                     | 1,021     | 0               | 763        | 1              | 66          | Female | Other method          | Stage I   |
| TCGA-3A-A9IJ-01A | Tumor       | Yes             | Yes                     | 1,854     | 0               | 1,854      | 0              | 65          | Male   | Whipple               | Stage I   |
| TCGA-3A-A9IL-01A | Tumor       | Yes             | Yes                     | 2,741     | 0               | 2,741      | 0              | 39          | Female | Whipple               | Stage I   |
| TCGA-3A-A9IN-01A | Tumor       | Yes             | Yes                     | 2,084     | 0               | 2,084      | 0              | 62          | Female | Other method          | Stage I   |
| TCGA-3A-A9IO-01A | Tumor       | Yes             | Yes                     | 1,942     | 0               | 1,942      | 0              | 55          | Male   | Distal pancreatectomy | NA        |
| TCGA-3A-A9IR-01A | Tumor       | Yes             | Yes                     | 1,542     | 0               | 1,542      | 0              | 64          | Female | Distal pancreatectomy | Stage I   |
| TCGA-3A-A9IS-01A | Tumor       | Yes             | Yes                     | 998       | 0               | 998        | 0              | 67          | Male   | Distal pancreatectomy | Stage I   |
| TCGA-3A-A9IU-01A | Tumor       | Yes             | Yes                     | 458       | 1               | NA         | NA             | 65          | Male   | Whipple               | Stage II  |
| TCGA-3A-A9IV-01A | Tumor       | Yes             | Yes                     | 1,103     | 0               | 1,103      | 0              | 59          | Female | Other method          | Stage I   |
| TCGA-3A-A9IX-01A | Tumor       | Yes             | Yes                     | 1,037     | 0               | 1,037      | 0              | 40          | Male   | Whipple               | Stage I   |
| TCGA-3A-A9IZ-01A | Tumor       | Yes             | Yes                     | 308       | 1               | NA         | NA             | 47          | Male   | Whipple               | Stage II  |
| TCGA-3A-A9J0-01A | Tumor       | Yes             | Yes                     | 743       | 0               | 363        | 1              | 75          | Male   | Whipple               | Stage II  |
| TCGA-3E-AAAY-01A | Tumor       | Yes             | Yes                     | 2,285     | 0               | 2,285      | 0              | 67          | Male   | Other method          | Stage II  |
| TCGA-3E-AAAZ-01A | Tumor       | Yes             | Yes                     | 2,182     | 1               | NA         | NA             | 71          | Male   | Other method          | Stage II  |
| TCGA-F2-6879-01A | Tumor       | Yes             | Yes                     | 334       | 1               | 183        | 1              | 57          | Male   | Whipple               | Stage II  |
| TCGA-F2-6880-01A | Tumor       | Yes             | Yes                     | 289       | 0               | 289        | 0              | 70          | Male   | Whipple               | Stage II  |
| TCGA-F2-7273-01A | Tumor       | Yes             | Yes                     | 592       | 1               | NA         | NA             | 54          | Male   | Whipple               | Stage II  |
| TCGA-F2-7276-01A | Tumor       | Yes             | Yes                     | 216       | 1               | 216        | 0              | 64          | Male   | Whipple               | Stage II  |
| TCGA-F2-A44G-01A | Tumor       | Yes             | Yes                     | 233       | 1               | 214        | 1              | 79          | Female | Whipple               | Stage II  |
| TCGA-F2-A44H-01A | Tumor       | Yes             | Yes                     | 586       | 0               | 586        | 0              | 65          | Male   | Whipple               | Stage II  |
| TCGA-F2-A7TX-01A | Tumor       | Yes             | Yes                     | 95        | 1               | 95         | 0              | 77          | Male   | Whipple               | Stage II  |
| TCGA-F2-A8YN-01A | Tumor       | Yes             | Yes                     | 517       | 0               | 517        | 0              | 76          | Male   | Whipple               | Stage II  |
| TCGA-FB-A4P5-01A | Tumor       | Yes             | Yes                     | 179       | 1               | 179        | 0              | 69          | Female | Whipple               | Stage II  |
| TCGA-FB-A4P6-01A | Tumor       | Yes             | Yes                     | 767       | 0               | 620        | 1              | 54          | Male   | Whipple               | Stage II  |
| TCGA-FB-A545-01A | Tumor       | Yes             | Yes                     | 732       | 1               | 732        | 0              | 72          | Female | Distal pancreatectomy | Stage II  |
| TCGA-FB-A5VM-01A | Tumor       | Yes             | Yes                     | 498       | 1               | 498        | 0              | 74          | Male   | Whipple               | Stage I   |
| TCGA-FB-A78T-01A | Tumor       | Yes             | Yes                     | 375       | 1               | 375        | 0              | 71          | Female | Whipple               | Stage II  |
| TCGA-FB-A7DR-01A | Tumor       | Yes             | Yes                     | 353       | 1               | 353        | 0              | 48          | Male   | Total pancreatectomy  | Stage II  |
| TCGA-FB-AAPP-01A | Tumor       | Yes             | Yes                     | 485       | 1               | 150        | 1              | 71          | Male   | Whipple               | Stage II  |
| TCGA-FB-AAPQ-01A | Tumor       | Yes             | Yes                     | 1,130     | 1               | NA         | NA             | 65          | Male   | Whipple               | Stage II  |
| TCGA-FB-AAPS-01A | Tumor       | Yes             | Yes                     | 228       | 0               | NA         | NA             | 62          | Female | Whipple               | Stage II  |
| TCGA-FB-AAPU-01A | Tumor       | Yes             | Yes                     | 381       | 1               | 381        | 0              | 41          | Female | Whipple               | Stage II  |
| TCGA-FB-AAPY-01A | Tumor       | Yes             | Yes                     | 1,059     | 1               | 1,059      | 0              | 71          | Male   | Whipple               | Stage II  |
| TCGA-FB-AAPZ-01A | Tumor       | Yes             | Yes                     | 716       | 0               | 716        | 1              | 54          | Male   | Whipple               | Stage II  |
| TCGA-FB-AAQ0-01A | Tumor       | Yes             | Yes                     | 473       | 1               | 473        | 0              | 68          | Male   | Whipple               | Stage II  |
| TCGA-FB-AAQ1-01A | Tumor       | Yes             | Yes                     | 123       | 1               | NA         | NA             | 49          | Male   | Whipple               | Stage II  |
| TCGA-FB-AAQ2-01A | Tumor       | Yes             | Yes                     | 153       | 1               | 92         | 1              | 81          | Female | Whipple               | Stage II  |
| TCGA-FB-AAQ3-01A | Tumor       | Yes             | Yes                     | 31        | 1               | 31         | 0              | 65          | Female | Whipple               | Stage II  |

Table S1. Continued.

| Sample ID        | Sample type | DNA methylation | Transcriptome profiling | OS (days) | Survival status | RFS (days) | Relapse status | Age (years) | Gender | Surgery type          | TNM stage |
|------------------|-------------|-----------------|-------------------------|-----------|-----------------|------------|----------------|-------------|--------|-----------------------|-----------|
| TCGA-FB-AAQ6-01A | Tumor       | Yes             | Yes                     | 244       | 1               | 213        | 1              | 85          | Male   | Distal pancreatectomy | Stage I   |
| TCGA-H6-8124-01A | Tumor       | Yes             | Yes                     | 392       | 0               | 259        | 1              | 56          | Female | Whipple               | Stage II  |
| TCGA-H6-A45N-01A | Tumor       | Yes             | Yes                     | 421       | 1               | 363        | 1              | 88          | Female | Distal pancreatectomy | Stage II  |
| TCGA-H8-A6C1-01A | Tumor       | Yes             | Yes                     | 671       | 0               | 455        | 1              | 53          | Male   | Whipple               | Stage II  |
| TCGA-HV-A5A3-01A | Tumor       | Yes             | Yes                     | 128       | 1               | 128        | 0              | 50          | Male   | Distal pancreatectomy | Stage II  |
| TCGA-HV-A5A4-01A | Tumor       | Yes             | Yes                     | 232       | 0               | 232        | 0              | 72          | Female | Distal pancreatectomy | Stage II  |
| TCGA-HV-A5A5-01A | Tumor       | Yes             | Yes                     | 289       | 0               | 289        | 0              | 61          | Female | Other method          | Stage II  |
| TCGA-HV-A5A6-01A | Tumor       | Yes             | Yes                     | 2,036     | 1               | 1,511      | 1              | 65          | Female | NA                    | Stage II  |
| TCGA-HV-A7OL-01A | Tumor       | Yes             | Yes                     | 252       | 0               | 123        | 1              | 70          | Male   | Other method          | Stage II  |
| TCGA-HV-A7OP-01A | Tumor       | Yes             | Yes                     | 978       | 0               | 346        | 1              | 72          | Male   | Whipple               | Stage II  |
| TCGA-HV-AA8V-01A | Tumor       | Yes             | Yes                     | 920       | 0               | 526        | 1              | 50          | Male   | Other method          | Stage II  |
| TCGA-HV-AA8X-01A | Tumor       | Yes             | Yes                     | 532       | 1               | 375        | 1              | 75          | Female | Distal pancreatectomy | Stage II  |
| TCGA-HZ-7289-01A | Tumor       | Yes             | Yes                     | 661       | 1               | 228        | 1              | 77          | Male   | Whipple               | Stage II  |
| TCGA-HZ-7918-01A | Tumor       | Yes             | Yes                     | 969       | 0               | 542        | 1              | 72          | Male   | Whipple               | Stage II  |
| TCGA-HZ-7919-01A | Tumor       | Yes             | Yes                     | 593       | 1               | 593        | 0              | 52          | Female | Whipple               | Stage II  |
| TCGA-HZ-7920-01A | Tumor       | Yes             | Yes                     | 236       | 1               | 236        | 0              | 71          | Male   | Whipple               | Stage I   |
| TCGA-HZ-7922-01A | Tumor       | Yes             | Yes                     | 4         | 0               | 4          | 0              | 61          | Female | Whipple               | Stage II  |
| TCGA-HZ-7923-01A | Tumor       | Yes             | Yes                     | 314       | 0               | 314        | 0              | 65          | Male   | Whipple               | Stage II  |
| TCGA-HZ-7924-01A | Tumor       | Yes             | Yes                     | 840       | 0               | 831        | 1              | 60          | Female | Whipple               | Stage II  |
| TCGA-HZ-7925-01A | Tumor       | Yes             | Yes                     | 614       | 1               | 364        | 1              | 66          | Male   | Whipple               | Stage II  |
| TCGA-HZ-7926-01A | Tumor       | Yes             | Yes                     | 518       | 1               | 340        | 1              | 57          | Male   | Whipple               | Stage II  |
| TCGA-HZ-8001-01A | Tumor       | Yes             | Yes                     | 706       | 0               | 706        | 0              | 69          | Male   | Whipple               | Stage III |
| TCGA-HZ-8002-01A | Tumor       | Yes             | Yes                     | 366       | 1               | 366        | 0              | 61          | Male   | Whipple               | Stage II  |
| TCGA-HZ-8003-01A | Tumor       | Yes             | Yes                     | 596       | 1               | NA         | NA             | 65          | Female | Whipple               | Stage II  |
| TCGA-HZ-8005-01A | Tumor       | Yes             | Yes                     | 120       | 1               | 120        | 0              | 81          | Male   | Whipple               | Stage II  |
| TCGA-HZ-8315-01A | Tumor       | Yes             | Yes                     | 299       | 1               | 299        | 0              | 54          | Female | Whipple               | Stage II  |
| TCGA-HZ-8317-01A | Tumor       | Yes             | Yes                     | 378       | 1               | 378        | 0              | 69          | Female | Whipple               | Stage II  |
| TCGA-HZ-8519-01A | Tumor       | Yes             | Yes                     | 454       | 0               | 454        | 0              | 73          | Male   | Whipple               | Stage II  |
| TCGA-HZ-8636-01A | Tumor       | Yes             | Yes                     | 545       | 1               | 545        | 0              | 58          | Female | Other method          | Stage I   |
| TCGA-HZ-8637-01A | Tumor       | Yes             | Yes                     | 517       | 1               | 517        | 0              | 76          | Female | Whipple               | Stage IV  |
| TCGA-HZ-8638-01A | Tumor       | Yes             | Yes                     | 151       | 1               | 151        | 0              | 84          | Female | Whipple               | Stage II  |
| TCGA-HZ-A49G-01A | Tumor       | Yes             | Yes                     | 660       | 0               | 660        | 0              | 58          | Female | Whipple               | Stage II  |
| TCGA-HZ-A49H-01A | Tumor       | Yes             | Yes                     | 491       | 0               | 491        | 0              | 68          | Female | Whipple               | Stage II  |
| TCGA-HZ-A49I-01A | Tumor       | Yes             | Yes                     | 308       | 1               | 308        | 0              | 77          | Male   | Whipple               | Stage II  |
| TCGA-HZ-A4BH-01A | Tumor       | Yes             | Yes                     | 194       | 0               | 194        | 0              | 75          | Male   | Whipple               | Stage II  |
| TCGA-HZ-A4BK-01A | Tumor       | Yes             | Yes                     | 657       | 0               | 657        | 0              | 72          | Male   | Whipple               | Stage II  |
| TCGA-HZ-A77O-01A | Tumor       | Yes             | Yes                     | 160       | 1               | 98         | 1              | 77          | Female | Whipple               | Stage II  |
| TCGA-HZ-A77P-01A | Tumor       | Yes             | Yes                     | 330       | 0               | 330        | 0              | 77          | Male   | Whipple               | Stage II  |

Table S1. Continued.

| Sample ID        | Sample type | DNA methylation | Transcriptome profiling | OS (days) | Survival status | RFS (days) | Relapse status | Age (years) | Gender | Surgery type          | TNM stage |
|------------------|-------------|-----------------|-------------------------|-----------|-----------------|------------|----------------|-------------|--------|-----------------------|-----------|
| TCGA-HZ-A77Q-01A | Tumor       | Yes             | Yes                     | 33        | 0               | 33         | 0              | 55          | Female | Whipple               | Stage II  |
| TCGA-HZ-A8P0-01A | Tumor       | Yes             | Yes                     | NA        | NA              | NA         | NA             | 76          | Male   | Whipple               | Stage II  |
| TCGA-HZ-A8P1-01A | Tumor       | Yes             | Yes                     | 7         | 0               | 7          | 0              | 81          | Male   | Other method          | Stage I   |
| TCGA-HZ-A9TJ-01A | Tumor       | Yes             | Yes                     | 603       | 0               | 555        | 1              | 70          | Male   | Total pancreatectomy  | Stage IV  |
| TCGA-HZ-A9TJ-06A | Tumor       | Yes             | Yes                     | 603       | 0               | 555        | 1              | 70          | Male   | Total pancreatectomy  | Stage IV  |
| TCGA-IB-7644-01A | Tumor       | Yes             | Yes                     | 394       | 1               | 394        | 0              | 65          | Female | Whipple               | Stage IV  |
| TCGA-IB-7645-01A | Tumor       | Yes             | Yes                     | 1,502     | 1               | 1,210      | 1              | 44          | Female | Whipple               | Stage II  |
| TCGA-IB-7646-01A | Tumor       | Yes             | Yes                     | 145       | 1               | 145        | 0              | 60          | Male   | Whipple               | Stage II  |
| TCGA-IB-7649-01A | Tumor       | Yes             | Yes                     | 467       | 1               | 467        | 0              | 73          | Female | Whipple               | Stage II  |
| TCGA-IB-7651-01A | Tumor       | Yes             | Yes                     | 603       | 1               | 581        | 1              | 64          | Female | Whipple               | Stage II  |
| TCGA-IB-7652-01A | Tumor       | Yes             | Yes                     | 1,116     | 0               | 1,116      | 0              | 49          | Female | Distal pancreatectomy | Stage II  |
| TCGA-IB-7654-01A | Tumor       | Yes             | Yes                     | 476       | 1               | 476        | 0              | 80          | Male   | Whipple               | Stage II  |
| TCGA-IB-7885-01A | Tumor       | Yes             | Yes                     | 1,257     | 0               | 1,257      | 0              | 78          | Female | Whipple               | Stage II  |
| TCGA-IB-7886-01A | Tumor       | Yes             | Yes                     | 123       | 1               | 123        | 0              | 80          | Male   | Whipple               | Stage II  |
| TCGA-IB-7887-01A | Tumor       | Yes             | Yes                     | 110       | 1               | 110        | 0              | 62          | Female | Whipple               | Stage II  |
| TCGA-IB-7888-01A | Tumor       | Yes             | Yes                     | 1,332     | 1               | 1,332      | 0              | 66          | Female | Whipple               | Stage II  |
| TCGA-IB-7889-01A | Tumor       | Yes             | Yes                     | 481       | 1               | 481        | 0              | 85          | Female | Whipple               | Stage II  |
| TCGA-IB-7890-01A | Tumor       | Yes             | Yes                     | 598       | 1               | 519        | 1              | 73          | Male   | Distal pancreatectomy | Stage I   |
| TCGA-IB-7891-01A | Tumor       | Yes             | Yes                     | 913       | 1               | 872        | 1              | 49          | Female | Whipple               | Stage II  |
| TCGA-IB-7893-01A | Tumor       | Yes             | Yes                     | 117       | 1               | 80         | 1              | 64          | Male   | Distal pancreatectomy | Stage II  |
| TCGA-IB-7897-01A | Tumor       | Yes             | Yes                     | 486       | 1               | 486        | 0              | 53          | Female | Whipple               | Stage II  |
| TCGA-IB-8126-01A | Tumor       | Yes             | Yes                     | 462       | 0               | 83         | 1              | 79          | Female | Whipple               | Stage III |
| TCGA-IB-8127-01A | Tumor       | Yes             | Yes                     | 522       | 0               | 486        | 1              | 59          | Male   | Whipple               | Stage II  |
| TCGA-IB-A550-01A | Tumor       | Yes             | Yes                     | 365       | 1               | 276        | 1              | 71          | Male   | Whipple               | Stage II  |
| TCGA-IB-A55P-01A | Tumor       | Yes             | Yes                     | 482       | 0               | 482        | 0              | 77          | Male   | Whipple               | Stage II  |
| TCGA-IB-A55Q-01A | Tumor       | Yes             | Yes                     | 219       | 1               | NA         | NA             | 56          | Female | Whipple               | Stage I   |
| TCGA-IB-A55S-01A | Tumor       | Yes             | Yes                     | 460       | 1               | 460        | 0              | 64          | Female | Distal pancreatectomy | Stage II  |
| TCGA-IB-A55T-01A | Tumor       | Yes             | Yes                     | 635       | 0               | 635        | 0              | 64          | Female | Whipple               | Stage II  |
| TCGA-IB-A6UF-01A | Tumor       | Yes             | Yes                     | 666       | 0               | 593        | 1              | 63          | Male   | Whipple               | Stage II  |
| TCGA-IB-A6UG-01A | Tumor       | Yes             | Yes                     | 41        | 1               | 41         | 0              | 65          | Male   | Whipple               | Stage II  |
| TCGA-IB-A7LX-01A | Tumor       | Yes             | Yes                     | 250       | 1               | 230        | 1              | 57          | Male   | Whipple               | Stage II  |
| TCGA-IB-A7M4-01A | Tumor       | Yes             | Yes                     | 483       | 0               | 483        | 0              | 81          | Male   | Distal pancreatectomy | Stage II  |
| TCGA-IB-AAUM-01A | Tumor       | Yes             | Yes                     | 8         | 0               | 8          | 0              | 76          | Male   | Whipple               | Stage II  |
| TCGA-IB-AAUN-01A | Tumor       | Yes             | Yes                     | 144       | 1               | 144        | 0              | 74          | Female | Whipple               | Stage I   |
| TCGA-IB-AAUO-01A | Tumor       | Yes             | Yes                     | 239       | 1               | 211        | 1              | 64          | Female | Whipple               | Stage II  |
| TCGA-IB-AAUP-01A | Tumor       | Yes             | Yes                     | 431       | 0               | 431        | 0              | 68          | Male   | Other method          | Stage II  |
| TCGA-IB-AAUQ-01A | Tumor       | Yes             | Yes                     | 183       | 1               | 183        | 0              | 50          | Male   | Distal pancreatectomy | Stage II  |
| TCGA-IB-AAUR-01A | Tumor       | Yes             | Yes                     | 338       | 0               | 330        | 1              | 67          | Male   | Whipple               | Stage II  |

Table S1. Continued.

| Sample ID        | Sample type | DNA methylation | Transcriptome profiling | OS (days) | Survival status | RFS (days) | Relapse status | Age (years) | Gender | Surgery type          | TNM stage |
|------------------|-------------|-----------------|-------------------------|-----------|-----------------|------------|----------------|-------------|--------|-----------------------|-----------|
| TCGA-IB-AAUS-01A | Tumor       | Yes             | Yes                     | 225       | 0               | 225        | 0              | 84          | Female | Whipple               | Stage II  |
| TCGA-IB-AAUT-01A | Tumor       | Yes             | Yes                     | 287       | 0               | 287        | 0              | 65          | Male   | Whipple               | Stage II  |
| TCGA-IB-AAUU-01A | Tumor       | Yes             | Yes                     | 245       | 0               | 245        | 0              | 35          | Male   | Whipple               | Stage II  |
| TCGA-IB-AAUV-01A | Tumor       | Yes             | Yes                     | 404       | 0               | 404        | 0              | 49          | Male   | Whipple               | Stage II  |
| TCGA-IB-AAUW-01A | Tumor       | Yes             | Yes                     | 230       | 1               | 185        | 1              | 63          | Female | Whipple               | Stage II  |
| TCGA-L1-A7W4-01A | Tumor       | Yes             | Yes                     | 278       | 1               | 129        | 1              | 48          | Female | Whipple               | Stage II  |
| TCGA-LB-A7SX-01A | Tumor       | Yes             | Yes                     | 393       | 1               | 393        | 0              | 74          | Female | Whipple               | Stage II  |
| TCGA-LB-A8F3-01A | Tumor       | Yes             | Yes                     | 379       | 0               | 379        | 0              | 64          | Female | Whipple               | Stage II  |
| TCGA-LB-A9Q5-01A | Tumor       | Yes             | Yes                     | 313       | 1               | 290        | 1              | 63          | Female | Whipple               | Stage II  |
| TCGA-M8-A5N4-01A | Tumor       | Yes             | Yes                     | 584       | 0               | NA         | NA             | 48          | Female | Whipple               | Stage II  |
| TCGA-OE-A75W-01A | Tumor       | Yes             | Yes                     | 267       | 1               | 146        | 1              | 75          | Male   | Distal pancreatectomy | Stage II  |
| TCGA-PZ-A5RE-01A | Tumor       | Yes             | Yes                     | 470       | 1               | 393        | 1              | 44          | Female | Whipple               | Stage II  |
| TCGA-Q3-A5QY-01A | Tumor       | Yes             | Yes                     | 416       | 0               | 416        | 0              | 58          | Male   | Whipple               | Stage II  |
| TCGA-Q3-AA2A-01A | Tumor       | Yes             | Yes                     | 95        | 0               | 95         | 0              | 64          | Female | Whipple               | Stage I   |
| TCGA-RB-A7B8-01A | Tumor       | Yes             | Yes                     | 466       | 1               | 449        | 1              | 81          | Female | Whipple               | Stage II  |
| TCGA-RB-AA9M-01A | Tumor       | Yes             | Yes                     | 286       | 0               | 258        | 1              | 43          | Male   | Distal pancreatectomy | Stage II  |
| TCGA-RL-AAAS-01A | Tumor       | Yes             | Yes                     | 9         | 0               | 9          | 0              | 60          | Female | Whipple               | Stage I   |
| TCGA-S4-A8RM-01A | Tumor       | Yes             | Yes                     | 737       | 0               | 737        | 0              | 67          | Male   | Total pancreatectomy  | Stage II  |
| TCGA-S4-A8RO-01A | Tumor       | Yes             | Yes                     | 525       | 0               | 291        | 1              | 75          | Female | Whipple               | Stage II  |
| TCGA-S4-A8RP-01A | Tumor       | Yes             | Yes                     | 702       | 1               | NA         | NA             | 77          | Female | Whipple               | Stage II  |
| TCGA-US-A774-01A | Tumor       | Yes             | Yes                     | 695       | 1               | NA         | NA             | 76          | Female | Whipple               | Stage II  |
| TCGA-US-A776-01A | Tumor       | Yes             | Yes                     | 1,216     | 0               | 1,216      | 0              | 61          | Male   | Whipple               | Stage II  |
| TCGA-US-A779-01A | Tumor       | Yes             | Yes                     | 511       | 1               | NA         | NA             | 54          | Female | Whipple               | Stage II  |
| TCGA-US-A77E-01A | Tumor       | Yes             | Yes                     | 430       | 1               | NA         | NA             | 73          | Male   | Whipple               | Stage II  |
| TCGA-US-A77G-01A | Tumor       | Yes             | Yes                     | 12        | 1               | NA         | NA             | 64          | Male   | Whipple               | Stage II  |
| TCGA-US-A77J-01A | Tumor       | Yes             | Yes                     | 568       | 1               | NA         | NA             | 81          | Female | Whipple               | Stage II  |
| TCGA-XD-AAUG-01A | Tumor       | Yes             | Yes                     | 420       | 0               | 420        | 0              | 66          | Female | Other method          | Stage IV  |
| TCGA-XD-AAUH-01A | Tumor       | Yes             | Yes                     | 395       | 0               | 87         | 1              | 57          | Female | Whipple               | Stage II  |
| TCGA-XD-AAUI-01A | Tumor       | Yes             | Yes                     | 366       | 1               | 184        | 1              | 50          | Female | Whipple               | Stage II  |
| TCGA-XD-AAUL-01A | Tumor       | Yes             | Yes                     | 498       | 0               | 498        | 0              | 56          | Male   | Whipple               | Stage II  |
| TCGA-XN-A8T3-01A | Tumor       | Yes             | Yes                     | 951       | 0               | 461        | 1              | 67          | Male   | Whipple               | Stage I   |
| TCGA-XN-A8T5-01A | Tumor       | Yes             | Yes                     | 720       | 0               | 242        | 1              | 53          | Female | Whipple               | Stage I   |
| TCGA-YB-A89D-01A | Tumor       | Yes             | Yes                     | 350       | 0               | 350        | 0              | 59          | Male   | Whipple               | Stage II  |
| TCGA-YH-A8SY-01A | Tumor       | Yes             | Yes                     | 388       | 0               | NA         | NA             | 73          | Female | Whipple               | Stage III |
| TCGA-YY-A8LH-01A | Tumor       | Yes             | Yes                     | 2,016     | 0               | 2,016      | 0              | 61          | Female | Other method          | Stage II  |
| TCGA-Z5-AAPL-01A | Tumor       | Yes             | Yes                     | 467       | 0               | 467        | 0              | 74          | Female | NA                    | Stage II  |

OS, overall survival; RFS, recurrence-free survival; TCGA, The Cancer Genome Atlas; NA, not available.

Table SII. MethylMix models for the seven DNA methylation-driven genes.

| Gene     | Normal mean<br>DNA methylation | Tumor mean<br>DNA methylation | Log <sub>2</sub> FC | P-value               | Adjusted<br>P-value | Pearson<br>correlation | Pearson correlation<br>P-value |
|----------|--------------------------------|-------------------------------|---------------------|-----------------------|---------------------|------------------------|--------------------------------|
| ZNF208   | 0.229628198                    | 0.37030526                    | 0.689415            | 1.00x10 <sup>-5</sup> | 0.000191            | -0.43427               | 1.39x10 <sup>-9</sup>          |
| EOMES    | 0.200380253                    | 0.29929061                    | 0.578807            | 3.43x10 <sup>-4</sup> | 0.006517            | -0.4733                | 2.53x10 <sup>-11</sup>         |
| PTGDR    | 0.246551618                    | 0.361059454                   | 0.550347            | 1.93x10 <sup>-5</sup> | 0.000366            | -0.34637               | 2.18x10 <sup>-6</sup>          |
| C12orf42 | 0.226085619                    | 0.328240513                   | 0.537884            | 8.73x10 <sup>-6</sup> | 0.000166            | -0.31677               | 1.65x10 <sup>-5</sup>          |
| ITGA4    | 0.332801183                    | 0.46275722                    | 0.475595            | 7.79x10 <sup>-5</sup> | 0.00148             | -0.53869               | 8.75x10 <sup>-15</sup>         |
| DOCK8    | 0.67211299                     | 0.80454679                    | 0.259473            | 1.68x10 <sup>-5</sup> | 0.00032             | -0.39213               | 6.19x10 <sup>-8</sup>          |
| PPP1R14D | 0.547627109                    | 0.444988357                   | -0.29943            | 4.58x10 <sup>-5</sup> | 0.00087             | -0.55943               | 4.79x10 <sup>-16</sup>         |

FC, fold change; ZNF208, zinc finger protein 208; EOMES, eomesodermin; PTGDR, prostaglandin D2 receptor; C12orf42, chromosome 12 open reading frame 42; ITGA4, integrin subunit  $\alpha$  4; DOCK8, dedicator of cytokinesis 8; PPP1R14D, protein phosphatase 1 regulatory inhibitor subunit 14D.

Table SIII. Out of seven DNA methylation-driven genes, six were associated with overall survival in pancreatic adenocarcinoma.

| Gene/expression status | DNA methylation level | Number of patients | Mean survival time (years) | P-value |
|------------------------|-----------------------|--------------------|----------------------------|---------|
| ITGA4                  |                       |                    |                            | 0.001   |
| High                   | >0.470                | 77                 | 2.077                      |         |
| Low                    | ≤0.470                | 99                 | 3.759                      |         |
| ZNF208                 |                       |                    |                            | 0.003   |
| High                   | >0.348                | 101                | 2.256                      |         |
| Low                    | ≤0.348                | 75                 | 3.861                      |         |
| C12orf42               |                       |                    |                            | 0.004   |
| High                   | >0.237                | 155                | 2.414                      |         |
| Low                    | ≤0.237                | 21                 | 5.512                      |         |
| PPP1R14D               |                       |                    |                            | 0.004   |
| High                   | >0.541                | 18                 | 4.914                      |         |
| Low                    | ≤0.541                | 158                | 2.659                      |         |
| EOMES                  |                       |                    |                            | 0.006   |
| High                   | >0.235                | 115                | 2.335                      |         |
| Low                    | ≤0.235                | 61                 | 4.063                      |         |
| PTGDR                  |                       |                    |                            | 0.034   |
| High                   | >0.263                | 159                | 2.462                      |         |
| Low                    | ≤0.263                | 17                 | 4.567                      |         |
| DOCK8                  |                       |                    |                            | 0.138   |
| High                   | >0.874                | 20                 | 3.421                      |         |
| Low                    | ≤0.874                | 156                | 2.722                      |         |

ZNF208, zinc finger protein 208; EOMES, eomesodermin; PTGDR, prostaglandin D2 receptor; C12orf42, chromosome 12 open reading frame 42; ITGA4, integrin subunit  $\alpha$  4; DOCK8, dedicator of cytokinesis 8; PPP1R14D, protein phosphatase 1 regulatory inhibitor subunit 14D.

Table SIV. Out of seven DNA methylation-driven genes, six were associated with relapse-free survival in pancreatic adenocarcinoma.

| Gene/methylation status | DNA methylation level | Number of patients | Mean relapse-free survival (years) | P-value |
|-------------------------|-----------------------|--------------------|------------------------------------|---------|
| ITGA4                   |                       |                    |                                    | 0.001   |
| High                    | >0.544                | 43                 | 1.689                              |         |
| Low                     | ≤0.544                | 111                | 4.097                              |         |
| EOMES                   |                       |                    |                                    | 0.004   |
| High                    | >0.193                | 137                | 2.778                              |         |
| Low                     | ≤0.193                | 17                 | 7.072                              |         |
| PTGDR                   |                       |                    |                                    | 0.009   |
| High                    | >0.266                | 139                | 2.542                              |         |
| Low                     | ≤0.266                | 15                 | 6.498                              |         |
| ZNF208                  |                       |                    |                                    | 0.013   |
| High                    | >0.242                | 138                | 2.744                              |         |
| Low                     | ≤0.242                | 16                 | 6.457                              |         |
| C12orf42                |                       |                    |                                    | 0.021   |
| High                    | >0.232                | 138                | 2.713                              |         |
| Low                     | ≤0.232                | 16                 | 5.908                              |         |
| PPP1R14D                |                       |                    |                                    | 0.026   |
| High                    | >0.411                | 100                | 4.520                              |         |
| Low                     | ≤0.411                | 54                 | 2.097                              |         |
| DOCK8                   |                       |                    |                                    | 0.302   |
| High                    | >0.819                | 74                 | 3.471                              |         |
| Low                     | ≤0.819                | 80                 | 3.231                              |         |

ZNF208, zinc finger protein 208; EOMES, eomesodermin; PTGDR, prostaglandin D2 receptor; C12orf42, chromosome 12 open reading frame 42; ITGA4, integrin subunit  $\alpha$  4; DOCK8, dedicator of cytokinesis 8; PPP1R14D, protein phosphatase 1 regulatory inhibitor subunit 14D.



Table SV. Gene enrichment in the DNA methylation-driven genes hypermethylation group of patients with pancreatic adenocarcinoma.

| Pathway name                                       | Size | ES       | NES      | NOM P-val | FDR q-val | FWER P-val | Rank at max | Leading edge                   |
|----------------------------------------------------|------|----------|----------|-----------|-----------|------------|-------------|--------------------------------|
| <b>A, ZNF208</b>                                   |      |          |          |           |           |            |             |                                |
| KEGG_NEUROACTIVE_LIGAND_RECEPTOR_INTERACTION       | 252  | 0.594743 | 2.212443 | 0         | 0         | 0          | 3910        | Tags=38%, List=14%, Signal=44% |
| KEGG_SYSTEMIC_LUPUS_ERYTHEMATOSUS                  | 112  | 0.545371 | 1.839789 | 0         | 0.010674  | 0.039      | 5911        | Tags=44%, List=22%, Signal=56% |
| KEGG_BASAL_CELL_CARCINOMA                          | 55   | 0.571808 | 1.747291 | 0         | 0.027511  | 0.145      | 2107        | Tags=27%, List=8%, Signal=29%  |
| KEGG_CALCIIUM_SIGNALING_PATHWAY                    | 168  | 0.461002 | 1.648131 | 0         | 0.073091  | 0.421      | 4069        | Tags=29%, List=15%, Signal=33% |
| KEGG_MELANOGENESIS                                 | 101  | 0.462593 | 1.562708 | 0.003125  | 0.139896  | 0.717      | 3980        | Tags=26%, List=15%, Signal=30% |
| KEGG_HEDGEHOG_SIGNALING_PATHWAY                    | 56   | 0.494607 | 1.505588 | 0.01855   | 0.190959  | 0.878      | 2107        | Tags=23%, List=8%, Signal=25%  |
| KEGG_TYPE_I_DIABETES_MELLITUS                      | 39   | 0.514126 | 1.459959 | 0.039655  | 0.242273  | 0.957      | 5364        | Tags=38%, List=20%, Signal=48% |
| KEGG_GAP_JUNCTION                                  | 86   | 0.43832  | 1.419934 | 0.023772  | 0.294666  | 0.988      | 3980        | Tags=24%, List=15%, Signal=28% |
| KEGG_WNT_SIGNALING_PATHWAY                         | 145  | 0.384857 | 1.341232 | 0.034935  | 0.382296  | 1          | 3288        | Tags=17%, List=12%, Signal=19% |
| <b>B, EOMES</b>                                    |      |          |          |           |           |            |             |                                |
| Pathway name                                       | Size | ES       | NES      | NOM P-val | FDR q-val | FWER P-val | Rank at max | Leading edge                   |
| KEGG_NEUROACTIVE_LIGAND_RECEPTOR_INTERACTION       | 252  | 0.598928 | 2.184037 | 0         | 0         | 0          | 4251        | Tags=39%, List=15%, Signal=46% |
| KEGG_SYSTEMIC_LUPUS_ERYTHEMATOSUS                  | 112  | 0.550514 | 1.817459 | 0         | 0.013608  | 0.044      | 5473        | Tags=43%, List=20%, Signal=53% |
| KEGG_BASAL_CELL_CARCINOMA                          | 55   | 0.583623 | 1.755041 | 0.001553  | 0.024787  | 0.118      | 2562        | Tags=29%, List=9%, Signal=32%  |
| KEGG_CALCIIUM_SIGNALING_PATHWAY                    | 168  | 0.489236 | 1.729817 | 0         | 0.025092  | 0.155      | 4861        | Tags=33%, List=18%, Signal=40% |
| KEGG_MELANOGENESIS                                 | 101  | 0.515603 | 1.700824 | 0.001473  | 0.029737  | 0.228      | 3933        | Tags=28%, List=14%, Signal=32% |
| KEGG_HEDGEHOG_SIGNALING_PATHWAY                    | 56   | 0.53189  | 1.603355 | 0.00625   | 0.082142  | 0.578      | 3789        | Tags=30%, List=14%, Signal=35% |
| KEGG_GLYCOSPHINGOLIPID_BIOSYNTHESIS_GANGLIO_SERIES | 15   | 0.640549 | 1.495475 | 0.034608  | 0.196121  | 0.914      | 2194        | Tags=20%, List=8%, Signal=22%  |
| KEGG_GAP_JUNCTION                                  | 86   | 0.461965 | 1.485445 | 0.007278  | 0.187108  | 0.923      | 4112        | Tags=24%, List=15%, Signal=29% |
| KEGG_WNT_SIGNALING_PATHWAY                         | 145  | 0.407871 | 1.409852 | 0.017045  | 0.256834  | 0.996      | 4966        | Tags=25%, List=18%, Signal=30% |
| <b>C, PTGDR</b>                                    |      |          |          |           |           |            |             |                                |
| Pathway name                                       | Size | ES       | NES      | NOM P-val | FDR q-val | FWER P-val | Rank at max | Leading edge                   |
| KEGG_NEUROACTIVE_LIGAND_RECEPTOR_INTERACTION       | 252  | 0.622541 | 2.432184 | 0         | 0         | 0          | 3579        | Tags=40%, List=13%, Signal=45% |
| KEGG_CALCIIUM_SIGNALING_PATHWAY                    | 168  | 0.476982 | 1.762563 | 0         | 0.029698  | 0.135      | 4403        | Tags=32%, List=16%, Signal=38% |
| KEGG_BASAL_CELL_CARCINOMA                          | 55   | 0.544611 | 1.748362 | 0.001618  | 0.022748  | 0.155      | 3883        | Tags=36%, List=14%, Signal=42% |
| KEGG_SYSTEMIC_LUPUS_ERYTHEMATOSUS                  | 112  | 0.487984 | 1.740775 | 0         | 0.019216  | 0.176      | 5826        | Tags=43%, List=21%, Signal=54% |
| KEGG_HEDGEHOG_SIGNALING_PATHWAY                    | 56   | 0.50923  | 1.617801 | 0.001686  | 0.06419   | 0.557      | 3883        | Tags=34%, List=14%, Signal=39% |

Table SV. Continued.

| Pathway name                                      | Size | ES       | NES      | NOM P-val | FDR q-val | FWER P-val | Rank at max | Leading edge                   |
|---------------------------------------------------|------|----------|----------|-----------|-----------|------------|-------------|--------------------------------|
| <b>C, PTGDR</b>                                   |      |          |          |           |           |            |             |                                |
| KEGG_MELANOGENESIS                                | 101  | 0.435495 | 1.54489  | 0.009274  | 0.110824  | 0.803      | 3883        | Tags=26%, List=14%, Signal=30% |
| KEGG_TYPE_I_DIABETES_MELLITUS                     | 39   | 0.490135 | 1.463671 | 0.042301  | 0.189482  | 0.964      | 5556        | Tags=36%, List=20%, Signal=45% |
| KEGG_WNT_SIGNALING_PATHWAY                        | 145  | 0.358233 | 1.325961 | 0.048706  | 0.324882  | 1          | 2244        | Tags=14%, List=8%, Signal=16%  |
| <b>D, C12orf42</b>                                |      |          |          |           |           |            |             |                                |
| <b>Pathway name</b>                               |      |          |          |           |           |            |             |                                |
| KEGG_NEUROACTIVE_LIGAND_RECEPTOR_INTERACTION      | 252  | 0.614826 | 2.271452 | 0         | 0         | 0          | 2968        | Tags=35%, List=11%, Signal=38% |
| KEGG_BASAL_CELL_CARCINOMA                         | 55   | 0.600736 | 1.824457 | 0         | 0.009605  | 0.041      | 2121        | Tags=27%, List=8%, Signal=29%  |
| KEGG_SYSTEMIC_LUPUS_ERYTHEMATOSUS                 | 112  | 0.508716 | 1.722249 | 0         | 0.029748  | 0.173      | 4855        | Tags=36%, List=18%, Signal=43% |
| KEGG_CALCIIUM_SIGNALING_PATHWAY                   | 168  | 0.485002 | 1.718423 | 0         | 0.024018  | 0.185      | 4554        | Tags=32%, List=17%, Signal=38% |
| KEGG_HEDGEHOG_SIGNALING_PATHWAY                   | 56   | 0.542191 | 1.623738 | 0.006441  | 0.064696  | 0.506      | 2180        | Tags=23%, List=8%, Signal=25%  |
| KEGG_MELANOGENESIS                                | 101  | 0.467836 | 1.586882 | 0.002981  | 0.102111  | 0.729      | 4242        | Tags=28%, List=15%, Signal=33% |
| KEGG_GLYCOPHINGOLIPID_BIOSYNTHESIS_GANGLIO_SERIES | 15   | 0.632486 | 1.505021 | 0.037523  | 0.142084  | 0.884      | 2364        | Tags=20%, List=9%, Signal=22%  |
| KEGG_MATURITY_ONSET_DIABETES_OF_THE_YOUNG         | 24   | 0.551631 | 1.46383  | 0.048696  | 0.179453  | 0.95       | 2484        | Tags=38%, List=9%, Signal=41%  |
| KEGG_GAP_JUNCTION                                 | 86   | 0.435387 | 1.421312 | 0.039454  | 0.225727  | 0.987      | 3571        | Tags=23%, List=13%, Signal=27% |
| KEGG_WNT_SIGNALING_PATHWAY                        | 145  | 0.396254 | 1.386129 | 0.021277  | 0.266954  | 0.997      | 2682        | Tags=15%, List=10%, Signal=17% |
| <b>E, ITGA4</b>                                   |      |          |          |           |           |            |             |                                |
| <b>Pathway name</b>                               |      |          |          |           |           |            |             |                                |
| KEGG_NEUROACTIVE_LIGAND_RECEPTOR_INTERACTION      | 252  | 0.608302 | 2.231988 | 0         | 0         | 0          | 3815        | Tags=38%, List=14%, Signal=44% |
| KEGG_SYSTEMIC_LUPUS_ERYTHEMATOSUS                 | 112  | 0.57615  | 1.963052 | 0         | 5.82E-04  | 0.002      | 4454        | Tags=38%, List=16%, Signal=46% |
| KEGG_BASAL_CELL_CARCINOMA                         | 55   | 0.60677  | 1.842558 | 0         | 0.006509  | 0.035      | 1831        | Tags=27%, List=7%, Signal=29%  |
| KEGG_CALCIIUM_SIGNALING_PATHWAY                   | 168  | 0.492083 | 1.749327 | 0         | 0.018207  | 0.123      | 4594        | Tags=33%, List=17%, Signal=39% |
| KEGG_HEDGEHOG_SIGNALING_PATHWAY                   | 56   | 0.56016  | 1.69473  | 0         | 0.032629  | 0.259      | 1691        | Tags=23%, List=6%, Signal=25%  |
| KEGG_MELANOGENESIS                                | 101  | 0.487829 | 1.620455 | 0         | 0.064642  | 0.493      | 3828        | Tags=27%, List=14%, Signal=31% |
| KEGG_GLYCOPHINGOLIPID_BIOSYNTHESIS_GANGLIO_SERIES | 15   | 0.654545 | 1.525112 | 0.043876  | 0.14724   | 0.84       | 2260        | Tags=20%, List=8%, Signal=22%  |
| KEGG_GAP_JUNCTION                                 | 86   | 0.454534 | 1.481882 | 0.007564  | 0.187334  | 0.926      | 3832        | Tags=24%, List=14%, Signal=28% |
| KEGG_TYPE_I_DIABETES_MELLITUS                     | 39   | 0.511236 | 1.458973 | 0.044481  | 0.180068  | 0.954      | 4698        | Tags=31%, List=17%, Signal=37% |
| KEGG_WNT_SIGNALING_PATHWAY                        | 145  | 0.40051  | 1.386438 | 0.017956  | 0.291819  | 0.999      | 3456        | Tags=18%, List=13%, Signal=20% |

Table SV. Continued.

| Pathway name                                       | Size | ES       | NES      | NOM P-val | FDR q-val | FWER P-val | Rank at max | Leading edge                   |
|----------------------------------------------------|------|----------|----------|-----------|-----------|------------|-------------|--------------------------------|
| KEGG_BASAL_CELL_CARCINOMA                          | 55   | 0.562771 | 1.888317 | 0         | 0.026736  | 0.022      | 5210        | Tags=38%, List=19%, Signal=47% |
| KEGG_SYSTEMIC_LUPUS_ERYTHEMATOSUS                  | 112  | 0.496946 | 1.877308 | 0         | 0.015191  | 0.025      | 5617        | Tags=40%, List=20%, Signal=50% |
| KEGG_NEUROACTIVE_LIGAND_RECEPTOR_INTERACTION       | 252  | 0.443688 | 1.848408 | 0         | 0.01376   | 0.034      | 6305        | Tags=38%, List=23%, Signal=50% |
| KEGG_MELANOGENESIS                                 | 101  | 0.428658 | 1.601633 | 0         | 0.265451  | 0.568      | 7533        | Tags=43%, List=27%, Signal=58% |
| KEGG_MATURITY_ONSET_DIABETES_OF_THE_YOUNG          | 24   | 0.557809 | 1.59008  | 0.016014  | 0.242118  | 0.62       | 3048        | Tags=46%, List=11%, Signal=52% |
| KEGG_GLYCOSPHINGOLIPID_BIOSYNTHESIS_GANGLIO_SERIES | 15   | 0.613481 | 1.56843  | 0.031414  | 0.253864  | 0.705      | 1726        | Tags=20%, List=6%, Signal=21%  |
| KEGG_HEDGEHOG_SIGNALING_PATHWAY                    | 56   | 0.466463 | 1.567015 | 0.005068  | 0.220739  | 0.71       | 3459        | Tags=25%, List=13%, Signal=29% |
| KEGG_MAPK_SIGNALING_PATHWAY                        | 257  | 0.366005 | 1.54441  | 0         | 0.23962   | 0.794      | 7877        | Tags=39%, List=29%, Signal=55% |
| KEGG_PATHWAYS_IN_CANCER                            | 314  | 0.355193 | 1.53594  | 0         | 0.230392  | 0.814      | 5290        | Tags=27%, List=19%, Signal=33% |
| KEGG_APOPTOSIS                                     | 81   | 0.415191 | 1.517257 | 0.017771  | 0.243539  | 0.866      | 8105        | Tags=47%, List=30%, Signal=66% |
| KEGG_CALCIIUM_SIGNALING_PATHWAY                    | 168  | 0.365885 | 1.47827  | 0.005917  | 0.304015  | 0.939      | 6939        | Tags=33%, List=25%, Signal=44% |
| KEGG_TYPE_I_DIABETES_MELLITUS                      | 39   | 0.452133 | 1.447112 | 0.039655  | 0.359231  | 0.973      | 4086        | Tags=31%, List=15%, Signal=36% |
| KEGG_AMYOTROPIC_LATERAL_SCLEROSIS_ALS              | 50   | 0.432979 | 1.43949  | 0.042208  | 0.354766  | 0.977      | 4192        | Tags=28%, List=15%, Signal=33% |
| KEGG_WNT_SIGNALING_PATHWAY                         | 145  | 0.365004 | 1.428769 | 0.009317  | 0.357635  | 0.987      | 7305        | Tags=34%, List=27%, Signal=47% |
| KEGG_PROGESTERONE_MEDIATED_OOCYTE_MATURATION       | 84   | 0.379794 | 1.382112 | 0.031949  | 0.470754  | 1          | 8039        | Tags=38%, List=29%, Signal=54% |
| KEGG_NATURAL_KILLER_CELL_MEDIATED_CYTOTOXICITY     | 109  | 0.366082 | 1.371295 | 0.028875  | 0.473952  | 1          | 7673        | Tags=40%, List=28%, Signal=56% |
| KEGG_CELL_ADHESION_MOLECULES_CAMS                  | 123  | 0.348806 | 1.338286 | 0.033333  | 0.527531  | 1          | 5912        | Tags=34%, List=22%, Signal=43% |
| G_PPP1R14D                                         |      |          |          |           |           |            |             |                                |
| Pathway name                                       | Size | ES       | NES      | NOM P-val | FDR q-val | FWER P-val | Rank at max | Leading edge                   |
| KEGG_GLYCOLYSIS_GLUONEOGENESIS                     | 58   | 0.553743 | 1.755887 | 0         | 0.136289  | 0.096      | 2969        | Tags=28%, List=11%, Signal=31% |
| KEGG_TYROSINE_METABOLISM                           | 40   | 0.57889  | 1.73958  | 0.001996  | 0.082935  | 0.114      | 2973        | Tags=30%, List=11%, Signal=34% |
| KEGG_METABOLISM_OF_XENOBIOTICS_BY_CYTOCHROME_P450  | 56   | 0.540539 | 1.736085 | 0.004264  | 0.057989  | 0.118      | 4461        | Tags=41%, List=16%, Signal=49% |
| KEGG_PORPHYRIN_AND_CHLOROPHYLL_METABOLISM          | 31   | 0.608324 | 1.715271 | 0.003831  | 0.057883  | 0.154      | 7861        | Tags=68%, List=29%, Signal=95% |
| KEGG_HISTIDINE_METABOLISM                          | 28   | 0.626153 | 1.701934 | 0.002114  | 0.055349  | 0.183      | 2973        | Tags=32%, List=11%, Signal=36% |
| KEGG_FATTY_ACID_METABOLISM                         | 40   | 0.562469 | 1.69852  | 0.001996  | 0.048167  | 0.191      | 5235        | Tags=43%, List=19%, Signal=52% |

Table SV. Continued.

| Pathway name                                   | Size | ES       | NES      | NOM P-val | FDR q-val | FWER P-val | Rank at max | Leading edge                   |
|------------------------------------------------|------|----------|----------|-----------|-----------|------------|-------------|--------------------------------|
| KEGG_GLYOXYLATE_AND_DICARBOXYLATE_METABOLISM   | 16   | 0.676063 | 1.679307 | 0.007692  | 0.055096  | 0.243      | 2826        | Tags=31%, List=10%, Signal=35% |
| KEGG_RETINOL_METABOLISM                        | 51   | 0.534012 | 1.671231 | 0.003738  | 0.052099  | 0.261      | 2401        | Tags=27%, List=9%, Signal=30%  |
| KEGG_DRUG_METABOLISM_CYTOCHROME_P450           | 57   | 0.522528 | 1.651594 | 0         | 0.058147  | 0.32       | 4504        | Tags=40%, List=16%, Signal=48% |
| KEGG_DRUG_METABOLISM_OTHER_ENZYMES             | 38   | 0.551456 | 1.643069 | 0.008114  | 0.058145  | 0.354      | 6223        | Tags=47%, List=23%, Signal=61% |
| KEGG_COMPLEMENT_AND_COAGULATION_CASCADES       | 68   | 0.492156 | 1.631483 | 0.003876  | 0.058786  | 0.383      | 6385        | Tags=43%, List=23%, Signal=55% |
| KEGG_ASCORBATE_AND_ALDARATE_METABOLISM         | 15   | 0.681481 | 1.600807 | 0.018832  | 0.076631  | 0.489      | 5235        | Tags=53%, List=19%, Signal=66% |
| KEGG_VALINE_LEUCINE_AND_ISOLEUCINE_DEGRADATION | 43   | 0.520034 | 1.596392 | 0.017341  | 0.074374  | 0.507      | 5794        | Tags=40%, List=21%, Signal=50% |
| KEGG_PYRIMIDINE_METABOLISM                     | 91   | 0.462837 | 1.56622  | 0.007707  | 0.094078  | 0.613      | 6711        | Tags=43%, List=24%, Signal=57% |
| KEGG_OLFACTORY_TRANSDUCTION                    | 323  | 0.385125 | 1.542193 | 0         | 0.109462  | 0.686      | 7858        | Tags=37%, List=29%, Signal=51% |
| KEGG_STARCH_AND_SUCROSE_METABOLISM             | 38   | 0.524011 | 1.541536 | 0.017375  | 0.103488  | 0.688      | 7861        | Tags=47%, List=29%, Signal=66% |
| KEGG_PHENYLALANINE_METABOLISM                  | 16   | 0.628765 | 1.52737  | 0.02214   | 0.110364  | 0.737      | 4884        | Tags=56%, List=18%, Signal=68% |
| KEGG_ALPHA_LINOLENIC_ACID_METABOLISM           | 18   | 0.594482 | 1.490558 | 0.038961  | 0.13935   | 0.843      | 4514        | Tags=33%, List=16%, Signal=40% |
| KEGG_GLYCEROPHOSPHOLIPID_METABOLISM            | 72   | 0.452169 | 1.486665 | 0.011765  | 0.136974  | 0.857      | 4514        | Tags=31%, List=16%, Signal=36% |
| KEGG_PENTOSE_AND_GLUCURONATE_INTERCONVERSIONS  | 17   | 0.600598 | 1.485368 | 0.045802  | 0.131372  | 0.86       | 4473        | Tags=35%, List=16%, Signal=42% |
| KEGG_PPARG_SIGNALING_PATHWAY                   | 65   | 0.461374 | 1.484232 | 0.01378   | 0.126468  | 0.861      | 4555        | Tags=29%, List=17%, Signal=35% |
| KEGG_STEROID_HORMONE_BIOSYNTHESIS              | 44   | 0.490589 | 1.482796 | 0.025591  | 0.122487  | 0.864      | 4461        | Tags=36%, List=16%, Signal=43% |
| KEGG_JAK_STAT_SIGNALING_PATHWAY                | 126  | 0.409776 | 1.472716 | 0.00409   | 0.127767  | 0.885      | 5057        | Tags=30%, List=18%, Signal=37% |
| KEGG_PEROXISOME                                | 72   | 0.434107 | 1.430692 | 0.013699  | 0.170264  | 0.949      | 6030        | Tags=33%, List=22%, Signal=43% |
| KEGG_INSULIN_SIGNALING_PATHWAY                 | 134  | 0.389931 | 1.423311 | 0.00996   | 0.174647  | 0.957      | 5653        | Tags=28%, List=21%, Signal=35% |
| KEGG_CHRONIC_MYELOID_LEUKEMIA                  | 70   | 0.416529 | 1.383552 | 0.035225  | 0.197437  | 0.986      | 7299        | Tags=39%, List=27%, Signal=52% |
| KEGG_TIGHT_JUNCTION                            | 127  | 0.374518 | 1.352319 | 0.011742  | 0.224666  | 0.996      | 3211        | Tags=16%, List=12%, Signal=18% |

KEGG, Kyoto Encyclopedia of Genes and Genomes; ES, enrichment score; NES, normalized enrichment score; NOM P-val, nominal P-value; FDR q-val, false discovery rate q value; FWER P-val, familywise-error rate P-value; ZNF208, zinc finger protein 208; EOMES, eomesodermin; PTGDR, prostaglandin D2 receptor; C12orf42, chromosome 12 open reading frame 42; ITGA4, integrin subunit  $\alpha$  4; DOCK8, dedicator of cytokinesis 8; PPP1R14D, protein phosphatase 1 regulatory inhibitor subunit 14D.
